# Supplementary material for: Genetic and morphological diversity in populations of Annona senegalensis Pers. occurring in Western (Benin) and Southern (Mozambique) Africa
Source: PeerJ. 2023 Aug 8;11:e15767. doi: 10.7717/peerj.15767 (PMC10416773; doi:10.7717/peerj.15767)
Supplement: Supplemental Information 2 [file peerj-11-15767-s002.xlsx]

## Sheet: k_run_20_f
Code_Tree	Country	Population	LMCH4 M04	LMCH4 M04	LMCH6 M06	LMCH6 M06	LMCH11 M11	LMCH11 M11	LMCH29	LMCH29	LMCH43	LMCH43	LMCH48	LMCH48	LMCH78	LMCH78	LMCH79	LMCH79	LMCH119	LMCH119	LMCH122	LMCH122
1	Benin	Ben_BGN	101	101	219	223	165	165	187	189	211	211	143	143	159	159	206	208	199	201	181	183
2	Benin	Ben_BGN	101	107	215	219	165	167	189	191	211	213	145	147	161	161	208	208	197	199	183	185
3	Benin	Ben_BGN	101	107	215	219	165	169	191	191	213	215	143	145	161	161	208	210	193	197	183	185
4	Benin	Ben_BGN	115	119	239	241	171	171	187	189	213	215	145	145	159	161	206	208	199	201	185	187
5	Benin	Ben_BGN	101	101	221	223	165	169	189	191	215	215	143	145	159	161	206	208	197	199	187	189
6	Benin	Ben_BGN	107	107	221	223	169	169	189	191	217	219	145	145	159	161	206	208	199	201	183	185
7	Benin	Ben_BGN	109	109	223	223	171	171	191	191	215	215	145	145	159	161	208	210	197	199	181	183
8	Benin	Ben_BGN	105	107	223	223	171	171	189	191	215	215	143	145	159	161	208	210	193	197	181	183
9	Benin	Ben_BGN	103	107	223	223	171	171	187	189	215	215	143	145	159	161	208	210	193	197	181	183
10	Benin	Ben_BGN	103	107	223	223	169	169	189	189	213	215	145	145	161	161	208	210	193	197	183	185
11	Benin	Ben_BGN	103	107	227	229	171	185	193	189	215	215	145	147	161	161	208	210	193	197	183	185
12	Benin	Ben_BGN	103	107	223	223	171	171	189	191	217	219	145	147	161	161	208	210	193	197	183	185
13	Benin	Ben_BGN	115	119	239	241	171	171	189	191	215	215	145	147	159	161	208	210	193	197	185	187
14	Benin	Ben_BGN	103	103	227	229	169	169	193	193	215	215	145	147	161	161	208	210	193	197	185	187
15	Benin	Ben_BGN	103	105	223	229	173	175	193	193	211	213	145	147	161	163	208	210	193	197	185	187
16	Benin	Ben_BGN	105	107	227	229	165	165	193	193	217	219	145	147	161	161	208	210	193	197	185	187
17	Benin	Ben_BGN	105	107	227	229	171	175	191	191	215	215	145	147	159	161	208	210	193	197	181	183
18	Benin	Ben_BGN	107	109	239	241	171	173	193	193	215	215	145	147	159	161	208	210	199	201	181	183
19	Benin	Ben_BGN	115	119	221	223	171	175	193	193	217	217	143	145	159	161	208	210	197	199	181	183
20	Benin	Ben_BGN	107	109	221	223	171	175	193	193	217	217	149	151	159	161	208	210	199	201	179	181
21	Benin	Ben_BGN	109	109	221	223	165	165	191	191	217	221	149	151	161	163	208	210	197	199	179	181
22	Benin	Ben_BGN	105	107	219	223	165	169	193	193	215	215	149	151	159	161	208	210	199	201	179	181
23	Benin	Ben_BGN	105	107	217	219	169	169	191	191	217	217	151	153	159	161	206	208	197	199	179	181
24	Benin	Ben_BGN	105	107	219	223	169	169	189	191	217	221	151	153	159	161	206	208	199	201	179	181
25	Benin	Ben_BGN	107	109	215	219	165	185	193	189	217	221	147	147	159	161	206	208	199	201	179	181
26	Benin	Ben_BGN	107	109	221	221	171	175	187	189	217	221	149	151	159	161	206	208	199	201	179	181
27	Benin	Ben_BGN	115	119	217	219	165	169	189	191	215	215	151	153	159	161	206	208	199	201	179	181
28	Benin	Ben_BGN	105	107	217	219	169	169	187	189	215	217	143	145	159	161	206	208	193	197	179	181
29	Benin	Ben_BGN	105	107	221	221	169	169	187	189	215	217	143	145	161	161	206	208	197	199	179	181
30	Benin	Ben_BGN	107	109	217	219	169	169	191	191	215	217	143	145	161	161	206	208	193	197	179	181
1	Benin	Ben_MPE	119	119	237	237	183	183	193	193	217	217	153	153	161	163	210	210	189	191	183	185
2	Benin	Ben_MPE	119	119	231	235	181	183	195	195	219	219	153	153	161	163	208	210	189	191	185	185
3	Benin	Ben_MPE	119	121	233	237	181	183	193	195	219	219	149	151	161	163	208	210	189	191	185	187
4	Benin	Ben_MPE	119	121	237	239	181	183	193	195	219	219	151	153	161	163	208	210	189	191	208	210
5	Benin	Ben_MPE	119	119	233	237	181	183	193	195	217	219	151	153	161	163	210	210	189	191	185	187
6	Benin	Ben_MPE	119	121	237	239	181	183	193	195	217	219	151	153	161	163	210	210	189	191	185	187
7	Benin	Ben_MPE	119	121	239	241	183	183	193	197	217	219	151	153	161	163	210	210	189	191	185	187
8	Benin	Ben_MPE	119	121	237	237	185	185	193	197	217	219	151	153	161	163	210	210	189	191	185	187
9	Benin	Ben_MPE	119	121	237	239	183	183	193	197	217	219	149	151	161	163	210	210	189	191	185	187
10	Benin	Ben_MPE	115	121	237	237	183	183	193	197	217	219	149	151	161	163	210	210	189	191	185	187
11	Benin	Ben_MPE	115	121	239	241	185	185	193	197	217	219	149	151	161	163	210	210	189	191	185	187
12	Benin	Ben_MPE	119	121	115	119	181	183	193	197	217	219	149	151	161	163	210	210	189	191	185	185
13	Benin	Ben_MPE	119	119	115	119	181	183	193	193	217	219	149	151	161	163	210	210	189	191	185	187
14	Benin	Ben_MPE	115	119	233	237	181	183	195	195	217	219	149	151	161	163	210	210	189	191	185	187
15	Benin	Ben_MPE	119	119	233	237	181	183	193	195	219	219	149	151	159	161	208	210	189	191	185	187
16	Benin	Ben_MPE	115	119	233	237	183	183	193	195	219	219	151	153	161	163	208	210	189	191	185	187
17	Benin	Ben_MPE	119	119	233	237	185	185	193	195	219	219	151	153	161	163	208	210	189	191	185	187
18	Benin	Ben_MPE	119	121	231	235	185	185	193	195	219	219	151	153	161	163	208	210	189	191	183	185
19	Benin	Ben_MPE	119	121	237	239	183	183	193	195	219	219	151	153	161	163	208	210	189	191	183	185
20	Benin	Ben_MPE	115	121	239	241	185	185	193	195	219	219	151	153	161	163	208	210	189	191	185	185
21	Benin	Ben_MPE	115	121	237	239	185	185	193	195	219	219	149	151	159	161	208	210	189	191	185	187
22	Benin	Ben_MPE	119	121	237	239	185	185	193	195	219	219	149	151	159	161	208	210	189	191	185	187
23	Benin	Ben_MPE	119	121	231	235	181	183	193	197	217	219	149	151	159	161	208	210	193	195	185	187
24	Benin	Ben_MPE	119	121	233	237	181	183	193	197	217	219	149	151	159	161	208	210	193	195	185	187
25	Benin	Ben_MPE	119	123	237	239	181	183	193	197	217	219	149	151	159	161	208	210	193	195	185	187
26	Benin	Ben_MPE	119	121	237	237	185	185	193	197	217	219	149	151	159	161	208	210	195	197	185	187
27	Benin	Ben_MPE	119	121	233	237	181	185	193	197	217	219	149	151	159	161	208	210	195	197	183	185
28	Benin	Ben_MPE	119	121	239	241	181	183	193	197	217	219	149	151	159	161	208	210	195	197	183	185
29	Benin	Ben_MPE	119	123	231	235	183	183	193	197	217	219	149	151	159	161	208	210	195	197	185	187
30	Benin	Ben_MPE	119	121	237	237	183	183	193	193	217	219	151	153	159	161	208	210	195	197	183	185
31	Benin	Ben_MPE	113	113	233	237	183	183	195	195	217	219	151	153	159	161	210	210	195	197	183	185
32	Benin	Ben_MPE	113	113	231	235	183	183	193	195	217	219	151	153	159	161	210	210	195	197	183	185
33	Benin	Ben_MPE	115	115	239	241	185	185	193	195	217	219	151	153	159	161	210	210	197	199	183	185
34	Benin	Ben_MPE	115	117	237	237	185	185	193	195	219	219	151	153	159	161	210	210	197	199	183	185
35	Benin	Ben_MPE	115	119	237	239	183	183	193	195	219	219	151	153	159	161	210	210	197	199	185	185
36	Benin	Ben_MPE	119	121	237	237	183	183	193	197	217	219	151	153	159	161	210	210	197	199	183	185
37	Benin	Ben_MPE	115	121	237	237	181	183	193	197	217	219	151	153	161	163	210	210	197	199	183	185
38	Benin	Ben_MPE	115	121	235	235	181	183	193	197	217	219	153	153	161	163	210	210	197	199	183	185
39	Benin	Ben_MPE	119	121	235	235	181	183	193	197	217	219	153	153	161	163	210	210	193	195	183	185
40	Benin	Ben_MPE	115	115	235	235	181	183	193	197	217	219	153	153	161	163	210	210	195	197	183	185
41	Benin	Ben_MPE	115	117	233	237	183	185	193	197	219	219	153	153	161	163	210	210	197	197	185	187
42	Benin	Ben_MPE	115	119	239	239	183	185	193	197	219	219	153	153	161	163	210	210	197	197	183	185
43	Benin	Ben_MPE	119	121	237	239	183	185	193	197	219	219	153	153	161	163	210	210	197	197	183	185
44	Benin	Ben_MPE	119	119	233	237	183	185	195	195	219	219	153	153	161	163	210	210	197	197	183	185
45	Benin	Ben_MPE	119	121	231	235	183	185	193	195	219	219	149	151	161	163	210	210	197	197	183	185
46	Benin	Ben_MPE	115	119	239	241	183	185	193	193	219	219	149	151	161	163	208	210	197	197	183	185
47	Benin	Ben_MPE	119	121	235	235	185	185	193	197	219	219	149	151	161	163	208	210	197	197	183	185
48	Benin	Ben_MPE	119	121	231	235	183	183	193	197	219	219	149	151	161	163	208	210	197	199	185	185
49	Benin	Ben_MPE	119	121	231	235	183	183	193	197	219	219	149	151	161	163	208	210	193	195	185	187
50	Benin	Ben_MPE	115	121	233	237	181	183	193	197	219	219	149	151	161	163	208	210	193	195	185	187
51	Benin	Ben_MPE	115	121	237	237	183	185	193	197	219	219	149	151	159	161	208	210	197	199	185	187
52	Benin	Ben_MPE	119	121	239	241	185	185	193	197	219	219	149	151	159	161	208	210	195	197	185	187
53	Benin	Ben_MPE	119	121	237	237	185	185	193	197	219	219	151	153	159	161	208	210	195	197	185	187
54	Benin	Ben_MPE	119	121	233	237	185	185	193	197	219	219	151	153	159	161	208	210	195	197	185	185
55	Benin	Ben_MPE	115	115	237	237	185	185	193	197	219	219	151	153	159	161	208	210	195	197	183	185
56	Benin	Ben_MPE	113	115	237	237	185	185	193	197	219	219	151	153	159	161	208	210	195	197	183	185
57	Benin	Ben_MPE	119	121	233	237	183	183	193	197	219	219	151	153	159	161	208	210	195	197	183	185
58	Benin	Ben_MPE	115	121	237	237	183	183	193	197	219	219	151	153	159	161	208	210	195	197	183	185
59	Benin	Ben_MPE	115	117	237	237	185	185	193	197	219	219	153	153	159	161	208	210	195	197	183	185
60	Benin	Ben_MPE	115	117	231	235	185	185	193	193	219	219	153	153	159	161	208	210	195	197	183	185
1	Mozambique	Moz_MEC	121	121	225	225	177	179	185	187	217	217	143	147	159	159	206	214	191	191	177	177
2	Mozambique	Moz_MEC	121	123	225	225	177	179	185	187	215	217	147	147	159	159	206	214	191	191	179	179
3	Mozambique	Moz_MEC	121	127	225	225	177	177	187	189	215	217	145	145	159	159	206	214	191	191	179	179
4	Mozambique	Moz_MEC	121	123	225	225	177	179	187	189	215	217	147	147	159	159	206	214	191	191	179	179
5	Mozambique	Moz_MEC	123	127	225	225	177	177	185	187	215	217	147	147	159	159	206	214	191	191	179	179
6	Mozambique	Moz_MEC	121	125	225	227	177	179	185	187	215	217	143	147	159	159	206	214	191	191	179	183
7	Mozambique	Moz_MEC	121	123	225	225	177	177	185	187	217	217	143	147	159	159	206	214	191	191	179	179
8	Mozambique	Moz_MEC	121	123	225	225	177	177	185	187	217	217	143	147	159	159	206	214	191	191	177	179
9	Mozambique	Moz_MEC	121	127	227	227	177	177	185	187	217	217	145	145	159	159	208	212	191	191	177	177
10	Mozambique	Moz_MEC	123	127	227	227	177	177	185	187	217	217	143	147	159	159	208	212	191	191	177	179
11	Mozambique	Moz_MEC	121	127	227	227	177	179	185	187	217	217	143	147	159	159	208	212	191	191	177	179
12	Mozambique	Moz_MEC	123	127	227	227	177	177	187	189	217	217	143	147	159	159	206	214	191	191	177	179
13	Mozambique	Moz_MEC	121	125	229	231	177	177	183	189	217	217	145	145	159	159	206	214	191	191	177	179
14	Mozambique	Moz_MEC	121	123	229	231	177	177	187	189	211	213	143	147	159	159	206	214	193	193	177	179
15	Mozambique	Moz_MEC	123	127	225	225	177	179	187	189	211	213	143	147	159	159	206	214	193	193	177	179
16	Mozambique	Moz_MEC	121	123	225	225	177	177	187	189	211	211	143	147	159	159	206	214	193	193	177	179
17	Mozambique	Moz_MEC	121	127	225	227	177	179	187	189	211	213	143	147	159	159	206	214	193	193	177	179
18	Mozambique	Moz_MEC	123	123	225	225	177	177	183	189	217	217	143	149	159	159	206	214	193	193	177	179
19	Mozambique	Moz_MEC	123	123	225	225	177	177	187	189	213	215	143	149	159	159	208	212	193	193	177	179
20	Mozambique	Moz_MEC	123	125	227	227	177	177	187	189	215	217	143	149	159	159	208	212	193	193	179	179
21	Mozambique	Moz_MEC	123	125	227	227	177	177	187	189	215	217	143	147	159	159	208	212	191	193	177	179
22	Mozambique	Moz_MEC	127	131	227	227	177	179	187	189	215	217	143	147	159	159	206	214	193	193	179	179
23	Mozambique	Moz_MEC	127	131	227	227	177	177	187	189	211	213	143	145	159	159	206	214	193	193	179	179
24	Mozambique	Moz_MEC	127	131	229	231	177	177	187	189	211	213	143	147	159	159	206	214	193	193	179	179
25	Mozambique	Moz_MEC	127	131	229	231	177	179	187	189	211	211	143	147	159	159	206	214	193	193	177	177
26	Mozambique	Moz_MEC	123	127	225	225	177	177	187	189	211	213	143	147	159	159	206	214	193	193	179	179
27	Mozambique	Moz_MEC	121	125	225	225	177	177	185	187	217	217	143	147	159	159	206	212	193	193	179	179
28	Mozambique	Moz_MEC	121	123	225	225	177	179	187	189	217	217	143	147	159	159	206	214	193	193	177	179
29	Mozambique	Moz_MEC	123	127	225	227	177	177	187	189	217	217	143	147	159	159	206	214	193	193	177	179
30	Mozambique	Moz_MEC	121	123	225	225	177	177	187	189	217	217	143	145	159	159	206	214	191	193	179	179
31	Mozambique	Moz_MEC	123	127	225	225	177	179	187	189	217	217	143	145	159	159	206	214	193	193	179	179
32	Mozambique	Moz_MEC	121	125	225	225	177	177	187	189	217	217	143	149	159	159	206	214	193	193	177	179
33	Mozambique	Moz_MEC	121	123	225	225	177	177	183	189	217	217	143	149	159	159	206	212	191	193	177	179
34	Mozambique	Moz_MEC	121	125	225	225	177	177	185	187	217	217	143	149	159	159	206	214	193	193	177	179
35	Mozambique	Moz_MEC	121	127	225	225	177	177	183	189	217	217	143	147	159	159	206	214	193	193	177	179
36	Mozambique	Moz_MEC	121	123	225	225	177	177	187	189	217	217	143	147	159	159	206	214	193	193	179	179
37	Mozambique	Moz_MEC	123	127	225	225	177	177	187	189	217	217	143	145	159	159	206	214	193	193	179	179
1	Mozambique	Moz_MAV	123	125	229	231	179	179	185	187	211	213	143	149	159	159	208	212	191	193	177	181
2	Mozambique	Moz_MAV	123	125	229	231	179	179	185	187	211	211	145	145	159	159	208	208	191	191	177	181
3	Mozambique	Moz_MAV	123	125	229	231	179	179	185	187	213	213	143	147	159	159	208	208	191	191	179	181
4	Mozambique	Moz_MAV	125	127	225	227	179	179	187	189	213	213	143	147	159	159	208	208	191	191	179	181
5	Mozambique	Moz_MAV	125	127	225	227	179	179	187	189	213	213	143	147	159	159	208	208	191	191	179	181
6	Mozambique	Moz_MAV	123	125	225	227	179	179	187	189	213	213	143	147	159	159	208	208	191	191	177	181
7	Mozambique	Moz_MAV	123	125	225	227	179	179	187	189	213	213	143	147	159	159	208	208	191	193	179	181
8	Mozambique	Moz_MAV	123	125	225	227	179	179	187	189	211	213	143	145	159	159	208	208	191	191	179	181
9	Mozambique	Moz_MAV	123	125	229	231	179	179	187	189	211	213	143	147	159	159	208	208	191	191	177	181
10	Mozambique	Moz_MAV	125	129	229	231	179	179	187	189	211	213	143	147	159	159	208	208	191	191	177	181
11	Mozambique	Moz_MAV	123	125	229	231	179	179	187	189	211	213	143	147	159	159	208	208	191	191	179	181
12	Mozambique	Moz_MAV	123	125	229	231	179	179	187	189	211	213	143	147	159	159	208	208	191	191	177	181
13	Mozambique	Moz_MAV	123	125	229	231	179	179	185	187	211	211	143	147	159	159	208	208	191	191	179	181
14	Mozambique	Moz_MAV	123	125	229	231	179	179	187	189	211	213	143	147	159	159	208	208	191	191	179	181
15	Mozambique	Moz_MAV	123	125	229	231	179	179	187	189	211	213	145	145	159	159	208	208	191	191	177	181
16	Mozambique	Moz_MAV	125	129	229	231	177	179	187	189	211	213	143	147	159	159	208	208	191	193	177	181
17	Mozambique	Moz_MAV	125	127	229	231	177	179	187	189	211	213	143	147	159	159	208	208	191	191	177	181
18	Mozambique	Moz_MAV	125	127	229	231	179	179	187	189	211	213	143	147	159	159	208	208	191	191	177	181
19	Mozambique	Moz_MAV	125	129	229	231	179	179	187	189	211	211	143	147	159	159	208	208	191	191	177	181
20	Mozambique	Moz_MAV	125	129	229	231	179	179	187	189	211	213	143	147	159	159	208	208	191	193	179	181
21	Mozambique	Moz_MAV	125	127	229	231	179	179	187	189	211	213	143	147	159	159	208	208	191	191	179	181
22	Mozambique	Moz_MAV	125	129	229	231	179	179	187	189	211	213	143	147	159	159	208	208	191	191	179	181
23	Mozambique	Moz_MAV	125	127	229	231	179	179	187	189	211	213	143	147	159	159	208	208	191	191	179	181
24	Mozambique	Moz_MAV	125	129	229	231	179	179	187	189	213	213	143	147	159	159	208	208	193	193	179	181
25	Mozambique	Moz_MAV	123	125	225	227	179	179	187	189	211	211	143	145	159	159	208	208	193	193	177	181
26	Mozambique	Moz_MAV	123	125	225	227	179	179	187	189	211	211	143	145	159	159	208	208	193	193	177	181
27	Mozambique	Moz_MAV	123	125	225	227	179	179	187	189	211	211	143	145	159	159	208	208	193	193	177	181
