# Supplementary material for: Genetic and morphological diversity in populations of Annona senegalensis Pers. occurring in Western (Benin) and Southern (Mozambique) Africa
Source: PeerJ. 2023 Aug 8;11:e15767. doi: 10.7717/peerj.15767 (PMC10416773; doi:10.7717/peerj.15767)
Supplement: Supplemental Information 3 [file peerj-11-15767-s003.xlsx]

## Sheet: Feuil1
Code_Tree	Country	Population	Dbh	Tot.hei	Bol.hei	Crown.hei	Crown.diam	Crown.shp	Fruit.len	Fruit.wid	Fruit.shp	Fruit.wei	Fruit.nseeds	Seeds.wei	Pulp.mass	Limb.len	Leav.len	Leav.wid	Petiol.len	Leav.len_Petiol.len	Leav.wei
1	Benin	Ben_BGN	7	3.7	1.8	1.9	3.201171661	0.593532682	28.8811538461567	28.6965384615401	1.00923076923077	2.73192307692382	18.2307692307712	0.736153846154128	0.736153846154128	9.37666666666673	6.016666666667	3.63000000000018	1.34666666666661	4.46214567296746	0.469666666666738
2	Benin	Ben_BGN	7.5	3.8	1.25	2.55	2.852612837	0.893917312	28.6966666666667	27.2300000000003	1.04999999999998	3.86166666666642	31.6666666666635	1.6649999999998	1.6649999999998	8.66333333333339	6.42666666666649	3.05666666666676	1.32666666666671	4.91138014759967	0.354666666666677
3	Benin	Ben_BGN	9	3.65	1.2	2.45	3.756248128	0.652246581	20.3757142857125	21.2876190476175	0.962380952380947	1.53999999999982	12.7619047619034	0.392857142857101	0.392857142857101	8.21999999999973	4.65333333333303	2.50666666666645	1.11333333333328	4.54589743599991	0.293333333333286
4	Benin	Ben_BGN	9.5	4.2	1.3	2.9	3.788799282	0.765413996	34.7423076923071	30.9465384615381	1.12076923076921	4.96576923076905	34.3461538461525	1.72384615384608	1.72384615384608	9.98333333333323	7.96666666666645	3.13666666666672	1.09666666666669	7.46013504999969	0.341666666666672
5	Benin	Ben_BGN	8.7	4.1	0.95	3.15	3.910639334	0.80549489	34.8893333333324	28.3390000000002	1.23666666666662	2.88999999999999	26.2333333333319	1.1176666666666	1.1176666666666	8.99999999999993	6.37999999999996	3.82	1.49	4.35234114393329	0.412333333333321
6	Benin	Ben_BGN	6.2	4.3	0.98	3.32	3.34326188	0.99304216	30.102777777778	26.9449999999998	1.11972222222223	2.96833333333342	23.3055555555561	1.1533333333334	1.1533333333334	9.3566666666666	7.42333333333317	3.17	0.953333333333352	7.89172679169963	0.763666666666634
7	Benin	Ben_BGN	8.2	3.9	1.4	2.5	3.549549267	0.704314777	37.9513793103439	32.6137931034478	1.16724137931032	4.05551724137918	22.4482758620685	1.28517241379305	1.28517241379305	9.40333333333327	6.13666666666657	3.20999999999999	1.07333333333334	5.74725903743314	0.343999999999981
8	Benin	Ben_BGN	9.5	4	0.95	3.05	4.783920986	0.637552336	24.666764705882	25.0823529411762	0.991764705882338	1.70529411764691	18.1176470588232	0.494117647058769	0.494117647058769	7.22666666666667	6.13333333333321	1.47000000000005	0.893333333333349	7.45217652726632	0.158333333333327
9	Benin	Ben_BGN	8.7	4.1	1.2	2.9	3.461690339	0.837741021	22.9300000000006	23.514285714286	0.986071428571427	1.72000000000014	16.5357142857145	0.446071428571478	0.446071428571478	6.78333333333293	5.29333333333327	1.39999999999965	0.823333333333255	6.60342592593367	0.289666666666623
10	Benin	Ben_BGN	5	3.8	1	2.8	2.309935064	1.212155287	26.5753846153854	27.4092307692312	0.964615384615388	2.07846153846174	14.7692307692316	0.487692307692385	0.487692307692385	9.33333333333322	6.74666666666666	3.77000000000001	0.793333333333253	8.55157407443377	0.384333333333295
11	Benin	Ben_BGN	10.5	4.8	1.6	3.2	5.95070584	0.537751333	30.0682142857139	28.9542857142855	1.04142857142856	4.81249999999952	30.1785714285693	2.00285714285687	2.00285714285687	8.75333333333341	5.76666666666663	4.04999999999992	1.33000000000002	4.35817127313317	0.495666666666647
12	Benin	Ben_BGN	11	4.5	1.1	3.4	5.286303056	0.643171601	27.8856250000003	25.9881250000008	1.07749999999997	2.80312499999994	15.6250000000005	1.19687499999984	1.19687499999984	9.45333333333332	7.58333333333309	3.59666666666669	1.23000000000001	6.17388999889985	0.449000000000008
13	Benin	Ben_BGN	12.5	4.2	1.65	2.55	5.574495493	0.457440499	30.683703703704	30.09	1.02481481481481	4.08185185185206	44.962962962967	1.68925925925943	1.68925925925943	8.67333333333335	5.95000000000002	3.52000000000001	0.929999999999965	6.46419913416678	0.311666666666672
14	Benin	Ben_BGN	10	3.75	0.45	3.3	5.845511098	0.564535751	28.7212903225806	29.4961290322579	0.974838709677415	4.55774193548348	25.8387096774177	1.94516129032234	1.94516129032234	8.68666666666669	5.62999999999999	3.33333333333335	1.34333333333331	4.23722887313348	0.398333333333333
15	Benin	Ben_BGN	21	4.5	0.85	3.65	7.346767997	0.496817104	28.0128571428572	28.5935714285712	0.979999999999999	3.12821428571425	28.0357142857131	1.2503571428571	1.2503571428571	11.7333333333333	7.27333333333323	3.95333333333333	1.54666666666667	4.74658369769974	0.444999999999978
16	Benin	Ben_BGN	15	4.2	0.65	3.55	7.27478522	0.487986915	29.6020833333335	27.7941666666662	1.07875000000002	3.74375000000035	22.6666666666681	1.17000000000017	1.17000000000017	10.3299999999998	8.06666666666635	3.25333333333341	1.17333333333335	6.89901579899971	0.453000000000005
17	Benin	Ben_BGN	12.7	4.7	1.35	3.35	7.994491854	0.419038516	24.7200000000005	26.2965217391307	0.939130434782608	2.55043478260867	23.0434782608687	1.08565217391298	1.08565217391298	9.69999999999988	7.10999999999972	3.0500000000001	0.993333333333398	7.23576257079936	2.15266666666637
18	Benin	Ben_BGN	11.7	3.2	0.95	2.25	4.542576361	0.495313633	25.6443478260864	23.2973913043466	1.10434782608697	2.75260869565222	21.9565217391312	1.01478260869574	1.01478260869574	11.0433333333335	7.22666666666704	4.33666666666681	1.2733333333333	5.79251877743368	0.369333333333296
19	Benin	Ben_BGN	15.2	4.4	1.4	3	6.888033101	0.435537977	34.5260606060582	35.9327272727243	0.965454545454549	6.00636363636211	28.4545454545406	1.32939393939363	1.32939393939363	8.88666666666671	6.19666666666658	4.40333333333317	0.920000000000089	6.75739538236613	0.563333333333306
20	Benin	Ben_BGN	10.7	3.7	1.2	2.5	6.925128158	0.361004149	31.7662068965522	32.2662068965521	0.989999999999994	4.3131034482761	39.7586206896581	1.48862068965528	1.48862068965528	9.84999999999996	8.19999999999986	3.07000000000008	1.14433333333332	7.1906493614666	0.473666666666669
21	Benin	Ben_BGN	13	4.3	1.4	2.9	5.167204273	0.561231925	23.5196666666657	24.2296666666657	0.971999999999987	2.56699999999999	12.6333333333322	0.707333333333355	0.707333333333355	10.4933333333334	5.91999999999991	3.79000000000001	1.21333333333333	4.94114015616657	0.478666666666657
22	Benin	Ben_BGN	11.5	3.9	1.5	2.4	4.235563717	0.566630598	26.1499999999994	25.2746666666659	1.04266666666667	3.61533333333358	17.2666666666664	1.09333333333344	1.09333333333344	7.72	5.67000000000004	3.33000000000004	1.01999999999996	5.53607707110021	0.310666666666665
23	Benin	Ben_BGN	7.5	2.3	1.2	1.1	2.569046516	0.428174419	21.993529411762	20.3076470588202	1.11647058823533	1.96941176470557	8.76470588234927	0.449999999999896	0.449999999999896	9.57000000000003	5.66333333333338	3.89000000000003	0.946666666666614	6.5184102935003	0.334666666666673
24	Benin	Ben_BGN	6.7	2.5	1.1	1.4	3.0757113	0.455179262	25.456000000001	26.4540000000006	0.964000000000007	3.18399999999985	13.2000000000016	1.11999999999988	1.11999999999988	9.41999999999993	6.40999999999985	3.61999999999999	0.850000000000107	8.03372414636589	0.336666666666672
25	Benin	Ben_BGN	9.8	3.7	1.5	2.2	6.176568627	0.356184823	28.4744230769229	28.7023076923074	0.993076923076917	4.74634615384614	21.3269230769229	1.69423076923078	1.69423076923078	8.82999999999997	5.89666666666673	3.69000000000003	0.996666666666601	5.94093906100036	0.404333333333336
26	Benin	Ben_BGN	8.7	2.9	1	1.9	6.329296959	0.300191319	36.4192857142844	34.2128571428561	1.06142857142855	10.93357142857	36.7142857142825	3.24357142857101	3.24357142857101	8.4633333333335	6.45666666666665	4.1366666666666	0.940000000000062	7.48978595463297	0.476333333333337
27	Benin	Ben_BGN	8.5	3.4	1.2	2.2	4.570557953	0.48134167	27.515	23.0550000000006	1.20142857142853	2.18999999999996	11.6428571428574	0.41785714285715	0.41785714285715	12.2966666666665	7.4833333333332	5.70333333333338	0.91333333333334	9.172222222333	0.646333333333315
28	Benin	Ben_BGN	9.5	4.5	1.9	2.6	6.08194048	0.427495141	22.372083333333	23.4312499999997	0.954583333333318	2.46541666666664	14.458333333333	0.697916666666652	0.697916666666652	11.3166666666667	7.43666666666667	4.53333333333337	1.05666666666666	9.35075840823349	0.43466666666665
29	Benin	Ben_BGN	10	4.7	1.8	2.9	6.670832032	0.43472838	29.7075757575757	29.1269696969695	1.02515151515151	3.49636363636366	18.1818181818183	0.889090909090931	0.889090909090931	11.7266666666665	6.61666666666662	4.60999999999992	1.08999999999999	6.40227272736657	0.45733333333333
30	Benin	Ben_BGN	9.8	4.4	1.7	2.7	6.116371473	0.441438198	25.1936363636355	24.6672727272714	1.02272727272728	2.8109090909092	20.181818181819	0.724545454545516	0.724545454545516	10.7699999999998	6.46666666666649	4.32666666666659	1.06000000000005	7.18524253529952	0.427666666666646
1	Benin	Ben_MPE	2.5	1.1	0.27	0.83	0.99664437	0.83279455	24.325238095239	22.0780952380962	1.09523809523808	1.64142857142887	21.047619047619	0.486190476190587	0.486190476190587	9.76000000000004	6.47333333333349	3.56333333333337	1.15333333333329	6.32620925370052	0.435666666666685
2	Benin	Ben_MPE	3.2	1.95	0.47	1.48	1.622713776	0.912052404	20.9024999999997	20.5622499999996	1.01674999999999	0.989749999999889	15.8499999999997	0.257749999999973	0.257749999999973	9.14000000000001	7.21666666666659	3.58000000000002	1.08333333333335	6.67713286716657	0.262666666666689
3	Benin	Ben_MPE	4	2	0.58	1.42	2.134549133	0.665245872	24.4905714285721	22.3394285714294	1.09542857142855	1.25571428571448	16.2857142857145	0.253142857142921	0.253142857142921	9.42000000000001	7.07666666666668	3.23666666666669	0.996666666666645	7.74848965860007	0.363000000000005
4	Benin	Ben_MPE	3.8	1.85	0.47	1.38	2.021237245	0.682750134	24.6930000000005	23.7203333333339	1.04366666666665	1.4113333333335	27.0999999999986	0.43700000000003	0.43700000000003	11.0000000000001	7.45666666666678	4.06333333333339	0.806666666666607	10.0561443187005	0.393333333333313
5	Benin	Ben_MPE	3.7	1.98	0.58	1.4	1.626868157	0.860549144	22.7622222222216	21.7366666666659	1.04888888888888	1.52592592592585	24.8518518518526	0.523703703703715	0.523703703703715	11.7599999999998	6.26666666666659	3.27000000000001	0.996666666666685	6.75905298399977	0.392
6	Benin	Ben_MPE	3.5	1.7	0.6	1.1	0.99789779	1.102317302	24.8054838709677	21.5145161290318	1.16516129032259	1.19129032258068	12.5806451612905	0.241935483871	0.241935483871	10.6133333333332	6.8399999999999	3.85333333333331	1.00000000000001	6.91428284676644	0.493999999999995
7	Benin	Ben_MPE	3.5	1.87	0.55	1.32	1.71096464	0.771494611	22.8533333333324	21.0822222222212	1.08694444444444	1.01083333333294	28.6666666666675	0.417777777777669	0.417777777777669	10.6233333333333	7.40000000000006	4.50000000000004	1.42333333333332	5.34277218153343	0.395999999999996
8	Benin	Ben_MPE	4.1	2.1	0.7	1.4	2.094254044	0.668495785	22.3334285714299	21.9485714285726	1.01514285714286	1.4325714285718	24.6857142857133	0.459142857142983	0.459142857142983	12.0533333333331	7.66666666666646	5.12333333333325	1.34666666666666	5.84427738923305	0.589666666666653
9	Benin	Ben_MPE	3.7	2	0.54	1.46	2.054726259	0.710556938	21.8791428571423	20.8725714285709	1.05028571428571	1.13657142857126	13.2571428571422	0.30828571428566	0.30828571428566	9.68666666666662	7.90666666666659	4.85666666666663	0.996666666666668	8.05609103866652	1.22099999999997
10	Benin	Ben_MPE	4.3	2.1	0.6	1.5	2.154599731	0.696184994	25.6982857142854	22.5128571428563	1.18428571428573	1.21914285714265	13.4857142857135	0.327999999999954	0.327999999999954	9.87333333333337	6.95333333333344	4.61333333333334	0.906666666666636	8.93523162033362	0.452333333333351
11	Benin	Ben_MPE	3	1.2	0.3	0.9	1.336038922	0.67363307	22.7939999999991	20.0589999999987	1.127	1.03899999999969	13.5999999999989	0.448999999999921	0.448999999999921	7.58333333333333	6.21999999999998	3.83666666666667	0.946666666666676	6.58908008656661	1.48333333333333
12	Benin	Ben_MPE	2.7	1.1	0.35	0.75	1.022643633	0.733393311	15.3542857142869	13.4157142857157	1.15285714285712	0.912857142857302	15.4285714285718	0.446428571428587	0.446428571428587	8.27333333333334	6.59999999999996	3.34666666666668	0.926666666666642	7.18012145256661	1.16499999999997
13	Benin	Ben_MPE	3.1	1.65	0.45	1.2	1.456159332	0.824085643	21.2621428571424	23.6614285714281	0.909999999999981	1.40928571428568	21.4285714285718	0.541428571428595	0.541428571428595	11.4766666666663	7.26333333333309	5.03999999999978	0.933333333333385	7.80068422323283	0.569333333333307
14	Benin	Ben_MPE	3.2	1.2	0.35	0.85	1.117944542	0.760323941	22.5338461538455	21.8346153846145	1.02923076923076	1.2130769230768	13.2307692307687	0.346153846153837	0.346153846153837	11.9433333333333	9.35333333333337	3.97666666666668	1.32999999999998	7.10480616603349	0.52
15	Benin	Ben_MPE	2.8	1.1	0.4	0.7	0.974114983	0.718600999	17.5899999999987	17.1315999999985	1.02839999999999	0.935599999999751	9.87999999999889	0.359199999999952	0.359199999999952	12.2433333333338	8.56666666666717	4.24000000000016	1.485	5.7764102563671	0.660000000000044
16	Benin	Ben_MPE	3.4	1.58	0.45	1.13	1.388992441	0.813539345	19.3964705882365	20.7400000000008	0.932352941176478	0.825882352941488	14.0588235294126	0.216470588235408	0.216470588235408	11.0766666666665	7.36666666666651	5.41666666666648	1.48999999999998	4.95852187036661	0.63399999999998
17	Benin	Ben_MPE	2.8	1.2	0.4	0.8	1.039374812	0.769693464	21.953333333334	18.1555555555564	1.24111111111108	0.637222222222452	21.9999999999998	0.190555555555629	0.190555555555629	11.0766666666665	7.36666666666656	5.41666666666648	1.48999999999998	4.95852187036664	0.633999999999987
18	Benin	Ben_MPE	3.1	1.35	0.47	0.88	1.356392274	0.648779868	20.8855555555536	20.4808333333314	1.03222222222221	1.16999999999959	15.6944444444437	0.302499999999868	0.302499999999868	11.3233333333332	6.85333333333324	3.71333333333333	1.16000000000001	5.99846486846647	0.42233333333332
19	Benin	Ben_MPE	2.8	1.2	0.45	0.75	1.476414576	0.507987399	17.7543750000035	19.1800000000029	0.940000000000012	0.81250000000053	8.25000000000258	0.178750000000146	0.178750000000146	11.0899999999997	6.39333333333319	3.51000000000002	1.31333333333332	4.88243894986642	0.43433333333332
20	Benin	Ben_MPE	3.3	1.4	0.5	0.9	1.524762277	0.590255946	19.7359523809533	20.2452380952388	0.979761904761902	0.831904761904945	15.976190476191	0.325714285714331	0.325714285714331	7.9166666666665	5.82999999999987	3.6	1.01499999999998	5.83357786006642	1.75166666666676
21	Benin	Ben_MPE	5.7	2	0.7	1.3	3.131980204	0.415072866	25.5762162162168	23.8362162162166	1.07270270270269	2.907837837838	15.4054054054059	1.29324324324328	1.29324324324328	7.91333333333316	5.11666666666654	3.35999999999998	0.916666666666639	5.63479437233327	0.376333333333314
22	Benin	Ben_MPE	3.1	1.2	0.35	0.85	1.576642001	0.539120485	26.8962857142857	23.1751428571426	1.16257142857143	1.90199999999993	26.8571428571432	0.697142857142862	0.697142857142862	9.93333333333347	7.09666666666694	3.33666666666666	1.28666666666662	5.58865693146716	0.318333333333327
23	Benin	Ben_MPE	4.8	2.7	0.65	2.05	1.992962619	1.028619393	26.7077142857138	25.4722857142849	1.04914285714286	1.7245714285712	21.1428571428575	0.486857142857085	0.486857142857085	9.37666666666661	6.59333333333324	3.62666666666666	0.773333333333346	8.73468253949981	0.402666666666649
24	Benin	Ben_MPE	3.8	3.3	0.57	2.73	2.338011976	1.16765869	21.3115909090928	21.4500000000017	0.99772727272727	1.52931818181855	10.9545454545474	0.499318181818273	0.499318181818273	12.4670000000002	8.03000000000004	5.22333333333347	1.47666666666667	5.49631582726656	0.754666666666671
25	Benin	Ben_MPE	4.5	1.65	0.4	1.25	2.080456681	0.600829622	29.7828125000002	27.3300000000002	1.09374999999999	1.59312500000012	15.1250000000002	0.355625000000031	0.355625000000031	11.923333333333	8.623333333333	3.39666666666668	1.37333333333333	6.41252427043303	0.554666666666643
26	Benin	Ben_MPE	3.8	1.85	0.7	1.15	1.500766471	0.766275115	23.8239999999993	23.9105714285705	1.00028571428571	2.04857142857137	18.0857142857144	0.867142857142894	0.867142857142894	9.08666666666663	6.24333333333335	3.67666666666669	1.32999999999999	4.72345598843331	0.454333333333326
27	Benin	Ben_MPE	3.2	1.6	0.45	1.15	1.597466745	0.71988979	22.4454761904748	20.8911904761885	1.08119047619049	1.77190476190465	9.69047619047441	0.532619047619057	0.532619047619057	9.83666666666665	7.2033333333334	3.91333333333336	1.32	5.78179006456668	0.488666666666673
28	Benin	Ben_MPE	4	1.65	0.6	1.05	1.956501981	0.536672086	26.4328571428571	26.4891428571428	1.03314285714285	2.60828571428574	22.4285714285716	0.94714285714288	0.94714285714288	8.88000000000001	7.12333333333314	3.65999999999999	0.983333333333375	7.2800505050329	1.31766666666657
29	Benin	Ben_MPE	3	1.57	0.35	1.22	1.565183695	0.779461225	26.3119999999997	24.0699999999992	1.10057142857144	1.88171428571425	14.2571428571425	0.45	0.45	9.17666666666667	6.06666666666673	3.62666666666668	1.28333333333332	4.76972249983361	0.445666666666672
30	Benin	Ben_MPE	3.1	1.35	0.6	0.75	1.56598212	0.478932671	24.9658823529406	24.4420588235286	1.02411764705882	1.82970588235282	19.6764705882356	0.77176470588238	0.77176470588238	10.5099999999998	8.66166666666621	5.10933333333314	1.13000000000003	7.90247863249934	0.413999999999984
31	Benin	Ben_MPE	3.2	1.5	0.35	1.15	1.176137747	0.977776628	23.6917142857142	23.8245714285713	0.998857142857134	2.20028571428566	15.885714285714	1.02228571428571	1.02228571428571	11.1333333333332	8.98333333333316	4.33666666666663	0.963333333333331	9.41867724836646	0.63266666666666
32	Benin	Ben_MPE	3.8	1.7	0.45	1.25	1.63688729	0.763644515	23.3717142857157	22.6860000000016	1.03714285714283	1.64057142857163	13.8857142857151	0.663142857142831	0.663142857142831	10.9233333333331	7.33666666666644	3.46333333333335	1.09666666666669	6.78239482739962	0.557333333333305
33	Benin	Ben_MPE	3.2	2.1	0.7	1.4	1.806903429	0.774806212	31.3383333333337	25.5046666666663	1.23233333333335	2.99366666666672	20.8333333333335	1.10900000000006	1.10900000000006	10.1033333333332	6.60999999999989	3.69999999999999	1.39333333333334	4.84401099933318	0.479999999999985
34	Benin	Ben_MPE	3.7	1.65	0.65	1	1.616106432	0.618771128	23.0269999999986	21.3292499999984	1.085	1.34024999999959	11.9749999999979	0.485249999999892	0.485249999999892	9.43333333333329	6.54999999999996	3.97666666666668	1.14666666666667	5.91557014616654	0.46999999999999
35	Benin	Ben_MPE	3.1	1.25	0.35	0.9	1.617559891	0.556393618	19.7979487179491	21.3679487179489	0.93410256410256	1.5979487179488	13.2307692307695	0.66871794871797	0.66871794871797	10.5900000000001	8.91666666666692	4.61333333333344	0.879999999999964	10.1672222222671	0.822333333333356
36	Benin	Ben_MPE	5	2.5	0.45	2.05	2.055577778	0.997286516	18.5853191489374	17.4706382978735	1.07382978723403	1.04872340425561	9.55319148936301	0.44723404255328	0.44723404255328	11.7733333333335	8.62333333333357	3.7266666666667	1.23666666666663	6.96354478860041	0.459666666666671
37	Benin	Ben_MPE	3.2	2.4	0.43	1.97	2.027239502	0.971764805	22.7895121951204	21.0707317073151	1.08878048780489	1.36853658536547	13.3658536585355	0.544390243902362	0.544390243902362	10.5866666666666	9.00000000000001	3.89333333333334	1.11333333333333	8.12511784513335	0.824333333333331
38	Benin	Ben_MPE	4.1	3	0.5	2.5	2.110876595	1.184342091	27.1116666666664	23.7297222222211	1.14694444444447	2.57388888888895	11.2777777777768	0.780000000000058	0.780000000000058	11.4066666666665	6.62999999999994	4.4533333333333	1.10000000000002	6.12222222219985	0.531999999999989
39	Benin	Ben_MPE	5.5	4.5	0.7	3.8	2.303453928	1.649696551	21.3850000000002	18.852647058824	1.14764705882351	1.22735294117643	3.8823529411764	0.411470588235263	0.411470588235263	13.9400000000001	11.3700000000003	5.77000000000009	1.33999999999994	8.48123321126717	0.91900000000003
40	Benin	Ben_MPE	3.3	1.65	0.35	1.3	1.910340284	0.680507034	26.1268421052638	22.7897368421066	1.1531578947368	2.00947368421069	15.2631578947375	0.994473684210471	0.994473684210471	7.74333333333326	5.6666666666667	3.02333333333334	1.07666666666665	5.31208754210011	0.295666666666665
41	Benin	Ben_MPE	3.7	1.65	0.4	1.25	0.880511215	1.419629845	25.9307142857149	22.7857142857152	1.14428571428569	1.96238095238111	14.3571428571434	0.85571428571429	0.85571428571429	11.1266666666668	7.20000000000013	4.38333333333341	1.09333333333328	7.05277250520041	0.525333333333341
42	Benin	Ben_MPE	5.5	3.7	0.9	2.8	2.285278976	1.225233343	23.2981249999996	21.9609374999993	1.0575	1.74281249999996	15.9374999999999	0.73343750000003	0.73343750000003	8.66333333333327	6.53666666666664	3.10999999999999	0.90666666666664	7.34191798923342	0.434999999999984
43	Benin	Ben_MPE	4.2	1.6	0.45	1.15	1.943373356	0.591754537	27.8854285714288	26.3505714285716	1.06171428571428	3.10342857142864	27.057142857142	1.49771428571425	1.49771428571425	7.59333333333317	4.23333333333314	2.54333333333325	0.926666666666624	4.61000601253327	0.219333333333305
44	Benin	Ben_MPE	3	1.1	0.3	0.8	1.093160555	0.731822966	28.5620000000001	23.9616000000006	1.19719999999997	2.92919999999992	16.4399999999997	1.05639999999993	1.05639999999993	9.77333333333328	6.63999999999992	2.60666666666671	1.04333333333337	6.38622941876644	1.84333333333326
45	Benin	Ben_MPE	4.7	2.3	0.8	1.5	1.979242279	0.757865783	24.1416666666665	21.377222222222	1.13888888888888	2.24944444444431	10.4444444444437	0.636666666666601	0.636666666666601	8.39000000000013	6.6033333333333	3.19666666666674	0.940000000000007	7.0436700336665	1.76499999999986
46	Benin	Ben_MPE	5	2.3	0.7	1.6	2.109194159	0.758583553	20.9374358974372	21.007435897437	1.00358974358974	2.19461538461558	15.6923076923078	0.83589743589747	0.83589743589747	9.29999999999999	7.67000000000005	4.48666666666671	1.0133333333333	7.57616161623353	2.35833333333336
47	Benin	Ben_MPE	3.1	1.6	0.65	0.95	1.475093217	0.644027095	24.490952380952	22.7219047619039	1.05857142857143	4.83809523809562	19.0000000000007	1.67761904761924	1.67761904761924	8.66999999999996	7.1299999999999	2.95000000000002	0.896666666666685	8.4913383837331	1.41266666666663
48	Benin	Ben_MPE	3.6	1.75	0.5	1.25	1.602342036	0.780108099	21.1677777777783	21.9800000000005	0.956666666666657	2.31185185185177	16.5185185185183	1.12148148148141	1.12148148148141	1.19551724137934	8.88137931034472	3.14379310344828	9.48793103448287	0.937474890379152	0.434827586206891
49	Benin	Ben_MPE	3	1.3	0.4	0.9	1.185411321	0.759230137	19.6490909090933	20.0712121212141	0.982121212121216	1.42303030303072	10.2727272727297	0.479090909091037	0.479090909091037	9.63666666666664	8.13000000000008	4.62000000000005	1.02999999999998	7.89291245793349	1.66166666666673
50	Benin	Ben_MPE	3.5	1.7	0.37	1.33	1.981741658	0.671126832	21.2129999999992	21.8724999999993	0.96899999999999	2.00849999999995	16.4499999999998	0.862500000000027	0.862500000000027	6.39333333333302	4.66999999999983	2.34666666666654	0.793333333333278	5.94907407406676	0.185999999999969
51	Benin	Ben_MPE	3.8	1.8	0.85	0.95	2.308679276	0.411490678	31.7530000000004	28.76	1.108	3.23100000000003	18.6999999999995	1.04700000000002	1.04700000000002	13.2000000000003	10.576666666667	4.62333333333344	1.0033333333333	10.5891582489671	0.894333333333369
52	Benin	Ben_MPE	5	2.5	0.5	2	0.944722181	2.117024496	33.2699999999999	25.7424999999999	1.29374999999999	3.35000000000009	25.1249999999998	1.07375000000002	1.07375000000002	10.8466666666665	9.10999999999968	5.0833333333332	1.12000000000002	8.16739871233291	0.723333333333307
53	Benin	Ben_MPE	3.8	1.85	0.55	1.3	0.906311205	1.434385885	27.36	22.5927272727274	1.22590909090907	2.83045454545451	19.4545454545451	1.29045454545451	1.29045454545451	9.8499999999999	8.26333333333304	4.13333333333329	0.963333333333366	8.63004014513284	0.794333333333297
54	Benin	Ben_MPE	5	1.7	0.4	1.3	1.775077463	0.732362405	27.1559999999998	22.4694285714285	1.21714285714284	3.17028571428557	14.9142857142853	1.19628571428565	1.19628571428565	12.0686666666668	9.17333333333351	3.26666666666667	1.20666666666665	7.96099567093364	0.532000000000005
55	Benin	Ben_MPE	4.8	2.5	0.6	1.9	2.791218372	0.680706325	23.8972222222223	23.9244444444446	0.99833333333332	2.63055555555547	13.8333333333333	0.950555555555517	0.950555555555517	12.2600000000001	9.2650000000001	4.29666666666669	1.21566666666664	7.73240729770025	0.729666666666671
56	Benin	Ben_MPE	4.2	2.3	0.7	1.6	2.020519735	0.791875463	31.782258064516	23.5777419354839	1.35193548387095	2.37096774193563	18.645161290323	1.01290322580652	1.01290322580652	8.5106666666666	6.05000000000002	2.80999999999997	0.999999999999967	6.05000000000015	0.320333333333325
57	Benin	Ben_MPE	5.1	2.5	1	1.5	1.749228401	0.85752095	31.8903030303031	26.7872727272727	1.19848484848484	3.01181818181803	18.1818181818175	1.18242424242418	1.18242424242418	11.3633333333335	7.70333333333347	5.68000000000042	1.19999999999996	7.27978465973366	0.688333333333355
58	Benin	Ben_MPE	3.7	1.8	0.6	1.2	2.098999762	0.571700875	18.9621621621622	20.8697297297297	0.908918918918911	1.43081081081082	18.5405405405406	0.641621621621635	0.641621621621635	8.55666666666658	6.30000000000005	3.63666666666668	0.883333333333269	9.53921966923395	0.473333333333336
59	Benin	Ben_MPE	3.9	1.95	0.7	1.25	2.181811174	0.572918507	29.2073333333333	19.7366666666673	1.49333333333329	3.07466666666669	15.4000000000005	1.25199999999999	1.25199999999999	8.55666666666661	7.10333333333343	3.1733333333333	1.25999999999999	5.66430735933343	0.432999999999997
60	Benin	Ben_MPE	3.5	2.1	0.65	1.45	2.116199423	0.685190622	23.9014285714278	24.1071428571422	0.995999999999987	3.13000000000001	20.2285714285714	1.40857142857152	1.40857142857152	9.86666666666663	8.38000000000003	3.82666666666667	1.03666666666664	8.07703703696679	1.04533333333335
1	Mozambique	Moz_MEC	5.3	2.7	1.8	0.9	1.870882145	0.481056491	33.0356410256407	27.2507692307693	1.22512820512818	7.02128205128171	42.0769230769207	2.65641025641012	2.65641025641012	5.84333333333309	4.17999999999988	2.32333333333328	0.629999999999916	11.1234920635338	0.185666666666656
2	Mozambique	Moz_MEC	5.5	3.9	1.6	2.3	2.041029152	1.126882484	28.112162162162	26.3094594594593	1.07486486486486	6.53189189189204	25.0270270270271	2.80810810810819	2.80810810810819	6.20000000000016	3.29090909090925	2.87272727272733	0.87727272727275	4.13726786236364	0.197272727272744
3	Mozambique	Moz_MEC	11.7	5.2	2.5	2.7	2.196337861	1.229319062	26.4264705882354	23.4564705882354	1.13294117647057	6.24058823529399	26.3529411764702	2.73058823529405	2.73058823529405	6.44444444444438	3.17777777777778	2.51481481481481	0.970370370370353	3.58731967614817	0.125925925925923
4	Mozambique	Moz_MEC	14.2	4.5	1.7	2.8	1.984842563	1.410691232	41.5134999999993	29.7064999999998	1.40229079989997	7.98924999999977	34.6999999999993	4.01949999999984	4.01949999999984	6.39090909090898	3.0499999999999	2.80454545454545	0.699999999999956	4.67099567095463	0.139545454545442
5	Mozambique	Moz_MEC	12.7	6	2.6	3.4	2.126852134	1.598606666	35.0442499999992	26.3212500000002	1.33249999999995	6.47674999999947	32.4249999999979	2.45024999999976	2.45024999999976	6.27037037037038	3.20740740740743	2.18148148148151	0.672222222222219	4.88074322799999	0.104074074074076
6	Mozambique	Moz_MEC	9.1	5.2	2.1	3.1	1.21577136	2.549821539	34.2872972972971	26.9756756756756	1.29486486486485	5.00027027027023	40.3783783783777	2.53378378378375	2.53378378378375	5.23333333333353	2.5458333333335	2.24166666666675	0.616666666666707	4.27503306874991	0.0925000000000181
7	Mozambique	Moz_MEC	9.3	5.6	2.8	2.8	1.422603248	1.968222697	24.1349999999997	19.6287499999989	1.23625000000002	2.75625000000014	22.3750000000008	1.80375000000018	1.80375000000018	5.84615384615376	3.55384615384613	2.21923076923076	0.676923076923055	6.83752358753853	0.0980769230769179
8	Mozambique	Moz_MEC	7.1	5.6	1.4	4.2	1.572195917	2.671422789	35.0868965517238	24.823103448276	1.41379310344825	4.35310344827589	43.2413793103435	1.80931034482758	1.80931034482758	5.63200000000016	3.14000000000013	2.93200000000004	0.768000000000038	4.35213675211984	0.109600000000011
9	Mozambique	Moz_MEC	15.9	6.4	1.8	4.6	1.176690274	3.909270012	26.8434482758622	24.0327586206894	1.12241379310345	3.08965517241399	18.6896551724147	1.81448275862081	1.81448275862081	6.36666666666675	4.12222222222233	2.69444444444447	0.766666666666661	5.88766280000008	0.137777777777785
10	Mozambique	Moz_MEC	8.3	7.5	3	4.5	2.508744706	1.793725758	27.5595238095238	25.9923809523811	1.06619047619046	5.44523809523783	15.9999999999997	2.52857142857129	2.52857142857129	8.28125000000001	7.00624999999997	3.68125000000002	0.762500000000007	10.4359893574998	0.656249999999998
11	Mozambique	Moz_MEC	10.7	6.3	2.1	4.2	2.053996105	2.04479453	35.7700000000002	32.0206666666666	1.122307481	4.48000000000014	19.0000000000003	1.76266666666675	1.76266666666675	7.97333333333336	6.23333333333333	3.50666666666668	0.743333333333354	9.4255561214665	0.303333333333339
12	Mozambique	Moz_MEC	17	4.4	1.7	2.7	2.017845386	1.338060894	20.7309090909098	19.5472727272735	1.06409090909089	2.95454545454541	22.5909090909085	1.23999999999994	1.23999999999994	9.80526315789473	9.27368421052639	3.93157894736843	0.93684210526314	10.9293466040002	0.225263157894729
13	Mozambique	Moz_MEC	8.3	5.2	0.9	4.3	1.732714633	2.481655039	31.6861538461539	24.3199999999999	1.31230769230769	3.34153846153851	22.6153846153847	1.66692307692311	1.66692307692311	7.44285714285723	4.67142857142863	2.6428571428572	1.125	4.80901008128576	0.247500000000012
14	Mozambique	Moz_MEC	6.3	3.9	2.7	1.2	0.967625961	1.24014862	26.1519999999999	21.3097499999992	1.23425000000002	3.38900000000018	27.1000000000012	1.85175000000017	1.85175000000017	9.4033333333333	6.44333333333331	2.90999999999997	1.18999999999999	6.41759644026664	0.286333333333324
15	Mozambique	Moz_MEC	14.2	4.5	1.8	2.7	1.787344399	1.510621009	25.2579999999995	21.9459999999991	1.15150000000001	3.85600000000008	17.8499999999995	1.94650000000013	1.94650000000013	7.23125	5.91874999999999	3.73750000000001	0.206250000000003	41.6770833331247	0.349375000000001
16	Mozambique	Moz_MEC	8.6	3	1.6	1.4	1.662949187	0.841877798	24.4450000000006	22.9433333333341	1.21166666666663	4.19055555555536	16.8888888888891	1.74944444444431	1.74944444444431	7.00714285714293	5.31428571428571	4.00714285714284	0.371428571428607	28.9342185597132	0.285714285714293
17	Mozambique	Moz_MEC	8.5	4.7	2.3	2.4	2.046313759	1.17284067	29.094	24.3019999999999	1.19999999999999	5.19400000000002	24.3333333333333	2.37733333333335	2.37733333333335	7.31874999999992	4.26874999999995	3.175	0.431249999999946	22.6629464284383	0.173124999999991
18	Mozambique	Moz_MEC	10.6	6.5	2.6	3.9	2.010248741	1.940058422	25.2546666666671	23.7353333333337	1.05670481893333	4.91999999999989	24.8666666666663	2.31666666666657	2.31666666666657	7.62333333333327	5.39999999999999	2.98333333333332	0.45999999999996	19.6380158729006	0.227666666666659
19	Mozambique	Moz_MEC	20	6	1.5	4.5	1.936569131	2.323697062	27.4818518518517	27.1385185185183	1.01444444444443	6.11481481481495	32.8148148148154	3.05666666666678	3.05666666666678	7.54999999999995	5.74000000000001	4.39333333333337	0.439999999999953	22.2972727275007	0.526333333333337
20	Mozambique	Moz_MEC	17.6	5.7	1.7	4	2.160856312	1.851117993	27.4586666666668	22.4250000000001	1.23899999999999	3.39600000000009	12.4666666666672	1.25600000000004	1.25600000000004	10.0433333333333	9.11666666666654	4.17333333333332	1.05666666666667	9.17906043829984	0.279333333333339
21	Mozambique	Moz_MEC	14.7	5.2	0.7	4.5	1.923174459	2.339881324	30.0725000000002	25.4699999999994	1.19000000000002	5.65000000000048	22.5000000000008	2.43500000000028	2.43500000000028	6.24999999999988	4.77999999999995	2.61666666666663	0.886666666666651	5.77501063763328	0.223666666666659
22	Mozambique	Moz_MEC	17	6.5	1.5	5	1.783900221	2.802847345	32.7066666666667	26.0466666666665	1.25333333333333	4.02666666666667	8.00000000000025	1.40000000000001	1.40000000000001	8.87000000000003	4.71666666666672	3.46000000000002	1.53	3.25911569273334	0.366333333333341
23	Mozambique	Moz_MEC	21.4	5.3	2.4	2.9	2.566807355	1.129808201	25.9379999999997	25.3809999999997	1.03499999999999	5.13000000000016	20.7	1.87900000000007	1.87900000000007	8.15666666666669	4.91000000000002	2.94333333333335	0.933333333333325	5.72534081656671	0.290666666666671
24	Mozambique	Moz_MEC	13.1	5.8	2.3	3.5	1.898789088	1.843280026	37.0078571428579	24.231428571428	1.53571428571433	3.9764285714287	52.2857142857173	2.27214285714301	2.27214285714301	7.19333333333321	4.4399999999999	2.38999999999994	0.666666666666629	7.80325396813344	0.157999999999984
25	Mozambique	Moz_MEC	17	5.2	1.5	3.7	2.238526301	1.652873142	20.8100000000007	19.1280000000007	1.62399999999994	2.08800000000004	17.7999999999999	0.782000000000007	0.782000000000007	7.87619047619038	5.82857142857143	3.09285714285713	1.08571428571426	5.51734329480962	0.243809523809511
26	Mozambique	Moz_MEC	13.7	6.5	2.6	3.9	2.000974762	1.94905007	27.4679999999999	26.4619999999996	1.044	3.84200000000018	19.0000000000005	1.57400000000013	1.57400000000013	6.82777777777774	4.89444444444438	2.4777777777777	0.711111111111084	7.50903880066684	0.114999999999986
27	Mozambique	Moz_MEC	10	3.6	1.8	1.8	1.775584411	1.013750734	22.5068000000001	21.8676	1.06719999999999	2.57440000000004	14.6800000000001	0.805200000000018	0.805200000000018	5.57999999999967	3.89499999999979	1.87999999999987	0.654999999999942	6.80136724405007	0.0819999999999688
28	Mozambique	Moz_MEC	9.8	5.2	2.6	2.6	2.003372157	1.297811787	20.8100000000002	19.1280000000004	1.09199999999998	1.91599999999992	10.7999999999995	0.599999999999959	0.599999999999959	7.14482758620684	4.12413793103438	2.28965517241378	0.917241379310317	4.86821330017242	0.15517241379309
29	Mozambique	Moz_MEC	15.4	4.5	1.8	2.7	1.614156126	1.672700649	24.3825925925931	22.7362962962966	1.07777777777777	3.38851851851861	16.1111111111117	1.07444444444449	1.07444444444449	6.3666666666665	4.52222222222228	2.73333333333331	0.444444444444414	22.0474747477785	0.219999999999995
30	Mozambique	Moz_MEC	12.3	2.6	1.5	1.1	2.483123034	0.442990535	27.94675	22.4444999999998	1.25374999999999	3.74125000000005	34.4750000000003	1.66550000000004	1.66550000000004	9.78461538461535	8.45384615384608	4.00384615384615	0.815384615384621	10.878429903346	0.374230769230772
1	Mozambique	Moz_MAV	16.9	7.2	1.8	5.4	5.547972603	0.973328527	30.3881818181817	29.2445454545454	1.0390909090909	4.43636363636358	14.9090909090908	1.72090909090907	1.72090909090907	8.71481481481482	6.1777777777778	3.41111111111113	0.799999999999986	8.59159986133341	0.388148148148151
2	Mozambique	Moz_MAV	15.6	9.1	3.9	5.2	4.811444689	1.080756475	34.9229999999999	28.7979999999998	1.21299999999999	8.92899999999989	24.5000000000001	3.27799999999997	3.27799999999997	10.7566666666667	9.02333333333335	4.10333333333335	0.929999999999988	10.0908261790667	0.403666666666668
3	Mozambique	Moz_MAV	11.1	5.2	3.9	1.3	3.792097045	0.342818231	43.1969999999999	35.3069999999997	1.22212851859999	10.102	37.2500000000002	3.58300000000001	3.58300000000001	9.10666666666669	7.40666666666665	4.52666666666666	0.886666666666672	8.82267917193324	0.410666666666674
4	Mozambique	Moz_MAV	16.7	4.9	1.5	3.4	3.987480407	0.852668766	34.6384374999998	29.1668749999998	1.20093749999999	8.22062499999979	40.4374999999992	3.83124999999989	3.83124999999989	10.3625	9.29374999999998	4.03750000000002	1.01874999999999	9.55855592256247	0.415625000000004
5	Mozambique	Moz_MAV	16.7	10.4	1.2	9.2	6.240192305	1.474313539	29.7846153846154	25.5523076923076	1.16615384615384	5.25153846153849	17.2307692307697	2.28076923076924	2.28076923076924	11.8566666666666	8.74333333333323	4.7133333333333	0.830000000000014	12.1700077652997	0.878999999999985
6	Mozambique	Moz_MAV	26.4	5.7	1.3	4.4	4.705316142	0.935112512	39.6744444444444	32.0266666666666	1.24915821844443	9.84444444444439	28.111111111111	4.19999999999997	4.19999999999997	8.3666666666667	6.53999999999999	3.86333333333334	0.933333333333339	7.41533216803324	0.46566666666667
7	Mozambique	Moz_MAV	15.1	4.5	1.7	2.8	2.442662482	1.146290173	36.9855000000003	27.7054999999999	1.3285	7.85100000000015	39.3000000000007	3.26800000000009	3.26800000000009	10.53	8.79333333333333	4.15333333333335	1.06333333333332	8.95738279143335	0.389000000000002
8	Mozambique	Moz_MAV	14.3	5.4	1.8	3.6	1.480168909	2.432154856	36.2547500000006	27.2904999999998	1.32550000000002	8.99725000000049	46.9500000000024	4.25475000000029	4.25475000000029	9.48461538461538	8.52692307692304	4.07307692307693	1.24999999999999	7.44828114646151	0.159230769230776
9	Mozambique	Moz_MAV	14.6	4.9	2.3	2.6	1.622498074	1.602467234	31.7300000000002	26.2290624999997	1.21781250000001	7.89656250000038	28.3750000000005	2.71843750000015	2.71843750000015	10.7133333333333	8.05666666666663	4.44333333333333	1.07666666666666	8.40500195713326	0.463666666666666
10	Mozambique	Moz_MAV	12.2	5.2	3	2.2	2.264045053	0.971712112	30.100975609756	27.3997560975609	1.10073170731706	6.51439024390221	37.3170731707306	2.83780487804867	2.83780487804867	10.9033333333334	8.6033333333334	3.90666666666669	1.22333333333332	9.08340274103347	0.181666666666669
11	Mozambique	Moz_MAV	25.7	7	3.1	3.9	2.880833213	1.353775006	23.0517647058824	21.7423529411765	1.06235294117646	3.990588235294	58.8235294117636	1.84117647058819	1.84117647058819	10.9777777777778	8.60740740740749	4.59259259259264	1.22222222222221	7.7960764153705	0.592592592592598
12	Mozambique	Moz_MAV	16.7	5.2	1.8	3.4	2.329699551	1.459415656	34.6934999999999	26.6777499999999	1.29799999999999	5.02274999999999	28.3250000000001	1.94775000000001	1.94775000000001	10.3566666666667	7.21000000000003	3.62666666666667	1.04333333333332	8.73340324923343	0.575333333333337
13	Mozambique	Moz_MAV	17.5	9.1	5	4.1	2.316333309	1.770038873	33.4013043478259	26.0521739130435	1.28391304347824	6.35608695652154	39.1304347826077	2.79434782608686	2.79434782608686	10.05	6.79666666666668	2.89666666666669	1.17333333333332	9.8099863496	0.392333333333336
14	Mozambique	Moz_MAV	18.1	9.6	2.5	7.1	2.405743128	2.95127103	33.8110256410255	28.1030769230768	1.20487179487178	6.98153846153836	35.2051282051278	3.36948717948712	3.36948717948712	11.5161290322581	8.17096774193554	4.75483870967746	0.758064516129014	12.5038594471292	0.814838709677427
15	Mozambique	Moz_MAV	14.4	8.4	1.5	6.9	2.1791971	3.166303773	33.1344999999998	23.87525	1.40224999999998	8.14974999999983	75.3499999999976	2.81924999999996	2.81924999999996	11.6607142857142	8.41428571428562	4.78214285714283	1.33214285714285	6.82335745489273	1.13678571428569
16	Mozambique	Moz_MAV	22.5	9.1	3.1	6	3.76696164	1.59279562	33.1142857142857	27.2035714285713	1.22214285714285	5.8821428571429	36.7500000000002	2.91785714285717	2.91785714285717	11.2999999999998	9.25999999999974	4.15499999999997	1.04000000000002	9.30516011724956	0.784999999999978
17	Mozambique	Moz_MAV	13.5	6	3	3	4.74341649	0.632455532	32.4787500000001	31.74175	1.02924999999999	9.00750000000014	18.5749999999999	3.52350000000008	3.52350000000008	11.28	8.84000000000004	3.41333333333335	0.973333333333319	9.60457690406676	0.450666666666669
18	Mozambique	Moz_MAV	22	7.2	2.2	5	5.944745579	0.841078888	33.6428571428571	27.380476190476	1.21714285714285	6.90523809523815	36.4761904761908	2.8919047619048	2.8919047619048	11.412	7.26400000000001	2.82800000000006	0.816000000000007	9.84732967019993	0.336000000000009
19	Mozambique	Moz_MAV	39.1	3.9	1.1	2.8	5.604462508	0.499601879	29.695	19.7404999999999	1.50725	8.68025000000005	37.7750000000003	3.38125000000004	3.38125000000004	12.4733333333334	9.41666666666671	4.61333333333336	1.41999999999999	9.19897761536674	1.01933333333334
20	Mozambique	Moz_MAV	14	6.2	1	5.2	8.093207028	0.642514146	28.97025	23.7932499999998	1.252	7.66950000000009	15.7749999999999	2.39550000000004	2.39550000000004	10.08	9.12000000000001	4.12333333333335	0.953333333333323	10.2848387723333	0.293666666666668
21	Mozambique	Moz_MAV	53	10.4	1.7	8.7	10.80509139	0.805175975	32.8392105263159	26.1992105263157	1.25763157894737	8.762105263158	26.0526315789475	3.44894736842111	3.44894736842111	12.0566666666667	7.96333333333335	4.74333333333336	1.16666666666665	7.47432949686673	0.804333333333336
22	Mozambique	Moz_MAV	20.1	4.5	1.1	3.4	5.049752469	0.673300329	35.0647499999999	29.6459999999998	1.18624999999999	9.17949999999988	39.3499999999998	4.51149999999995	4.51149999999995	12.9733333333334	8.76000000000007	3.19666666666668	1.06333333333332	10.8936645247002	0.436000000000003
23	Mozambique	Moz_MAV	13.5	3.9	0.8	3.1	4.293017587	0.722102795	24.55175	21.5657499999999	1.14599999999999	8.07849999999999	51.65	2.97125000000002	2.97125000000002	10.0892857142857	7.44642857142857	4.24642857142859	0.560714285714275	14.39424603175	1.11178571428572
24	Mozambique	Moz_MAV	34.1	5.7	2.7	3	6.564297373	0.457017687	25.3122500000001	18.3545	1.40924999999999	6.22425000000001	42.025	2.76100000000002	2.76100000000002	14.3428571428571	11.7761904761905	6.22857142857144	0.933333333333323	15.9352707162857	1.70428571428571
25	Mozambique	Moz_MAV	21.7	6.5	1.8	4.7	7.330757123	0.641134322	41.0132499999999	32.7242499999998	1.25974999999999	9.90899999999998	33.7000000000001	4.29300000000001	4.29300000000001	14.2433333333333	10.5433333333333	5.13666666666668	1.29333333333332	9.48982843613333	1.52166666666667
26	Mozambique	Moz_MAV	12.1	4.2	1.4	2.8	5.81893461	0.481187741	40.4665	30.1814999999999	1.34725	9.47225000000006	34.6250000000003	3.95925000000004	3.95925000000004	10.99	9.63333333333333	5.46666666666668	0.79999999999999	16.5379205518333	0.756999999999999
27	Mozambique	Moz_MAV	23.3	3.9	1.6	2.3	7.516648189	0.305987448	37.4646666666667	31.5609999999999	1.19166666666666	7.83966666666672	43.966666666667	2.91700000000004	2.91700000000004	10.83	9.33000000000005	4.3766666666667	1.03666666666665	9.9641405180001	0.883666666666674
